# Supplementary material for: PyFLEXTRKR: a flexible feature tracking Python software for convective cloud analysis
Source: Copernicus journal article supplement (doi:10.5194/gmd-16-2753-2023), 2023-05-23
Supplement: Supplementary file 1 [file gmd-16-2753-2023-supplement.zip]

Archive with 3 entries (3 files):
- Fig8_mcstracking_animation.mp4
- gmd-16-2753-2023-supplement-title-page.pdf
- Fig4_celltracking_animation.mp4
