# Supplementary material for: PyFLEXTRKR: a flexible feature tracking Python software for convective cloud analysis
Source: Copernicus journal article supplement (doi:10.5194/gmd-16-2753-2023), 2023-05-23
Supplement: Supplementary file 1 [file gmd-16-2753-2023-supplement.zip › gmd-16-2753-2023-supplement-title-page.pdf]

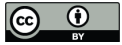

## *Supplement of*

# **PyFLEXTRKR: a flexible feature tracking Python software for convective cloud analysis**

**Zhe Feng et al.**

*Correspondence to:* Zhe Feng (zhe.feng@pnnl.gov)

- gmd-16-2753-2023-supplement-title-page.pdf
- Fig4\_celltracking\_animation.mp4
- Fig8\_mcstracking\_animation.mp4

The copyright of individual parts of the supplement might differ from the article licence.
